# Supplementary material
Source: MDPI journal article supplement (https://www.mdpi.com/2079-9284/5/1/20)
Supplement: s1 [file s1]

# Cosmeceutical properties of two cultivars of red raspberry grown under different conditions

Maria Papaioanou<sup>1</sup>, Evangelia G. Chronopoulou<sup>1</sup>, Gheorghii Ciobotari <sup>2</sup>, Rodica C. Efrose<sup>2</sup>, Liliana Sfichi-Duke<sup>2</sup>, Marianna Chatzikonstantinou<sup>1,3</sup>, Evangelia Pappa<sup>1</sup>, Ioannis Ganopoulos<sup>4</sup>, Panagiotis Madesis<sup>5</sup>, Irini Nianiou-Obeidat<sup>6</sup>, Taofen Zeng<sup>7</sup> and Nikolaos E. Labrou<sup>1,\*</sup>

**Supplementary Table 1.** Composition of the water and oil phases used for the preparation of cosmetic cream formulation.

| Water phase                  | % (w/w)* |
|------------------------------|----------|
| Water (ddH <sub>2</sub> O)   | 77.6     |
| Glycerin                     | 3.0      |
| Xanthan gum                  | 0.2      |
| Sodium gluconate             | 0.1      |
| Oil phase                    | % (w/w)  |
| Lanette N (cetearyl alcohol) | 4.0      |
| Cetyl alcohol                | 2.0      |
| Sweet almond oil             | 12.0     |
| Additive                     | % (w/w)  |
| Raspberry extract            | 1.0      |

\*As preservative (Geogard 0.8 % w/w) were added in the final preparation.

**Supplementary Table 2.** The effect of red raspberry cultivars, light intensity and substrate on acetylcholinesterase inhibition.

| Sample  | % Inhibition/mg |
|---------|-----------------|
| R/HL+S  | 0.2             |
| R/HL+P  | 0.2             |
| R/LL+S  | 0.1             |
| R/LL+ P | 0.2             |
| C/HL+S  | 0.1             |
| C/HL+ P | 0.1             |
| C/LL+S  | 0.1             |
| C/LL+P  | 0.1             |
